# Supplementary material
Source: publisher site journal article supplement (https://www.dovepress.com/article/318704)
Supplement: Supplementary file 1 [file get_supplementary_file.php]

**Table1 Tissue specimen information**

| <b>Case</b> | <b>Age</b> | <b>Gender</b> | <b>Tumor type</b>      | <b>Tumor staging</b> |
|-------------|------------|---------------|------------------------|----------------------|
| case 1      | 70         | female        | gastric adenocarcinoma | pT4aN1M1             |
| case 2      | 64         | male          | gastric adenocarcinoma | pT4N3bM1             |
| case 3      | 61         | female        | gastric adenocarcinoma | pT4N3M1              |

**Table 2 The primer information**

| <b>Gene</b> | <b>Primer direction</b> | <b>Primer sequence</b>    |
|-------------|-------------------------|---------------------------|
| NR_040535   | forward                 | GCGCTGCACTGTTGACTTTA      |
|             | reverse                 | TCAAACCCATTCCCGAGCTT      |
| NR_103847   | forward                 | CAAGTGTGCCCAAGAAATGG      |
|             | reverse                 | AGCAGCAGTGACAGTATCTGG     |
| NR_002594   | forward                 | ATGTACCTAGGCGAGAGGGA      |
|             | reverse                 | GGGCTCTGTGTGGTTTCTCT      |
| NR_034148   | forward                 | ACAGTCCAAACACGCCATCT      |
|             | reverse                 | TGAACTGGCAGCATGAGCTT      |
| NR_027133   | forward                 | CCAGTATGCCAAGTGAACACA     |
|             | reverse                 | ATGCACAGTGCTGAGTTGTTT     |
| NR_027422   | forward                 | CTGCTCTCCTGTGGGACAAA      |
|             | reverse                 | GAAATCTCATCCCCATCCTGAGT   |
| NR_027012   | forward                 | CCCCGATATGCACAGGATGG      |
|             | reverse                 | AGATAACGCGGTCAAATCATCA    |
| NR_046638   | forward                 | ATCCACCCACTTTGGAGACC      |
|             | reverse                 | ACTCTCTCCTGCTATCCCTTCA    |
| NR_120370   | forward                 | ACATTTGATGTGAAGCGCGG      |
|             | reverse                 | AAAGCTGAGACCAACCCACG      |
| NR_122038   | forward                 | AGCTTGTTTGTATGCCTCTCCT    |
|             | reverse                 | ACTCTGACTGAATGGAAGGGA     |
| NR_126348   | forward                 | AACACCGAAAAGGAGACGCA      |
|             | reverse                 | ACTTCCACATGGCAATGCAC      |
| NR_046200   | forward                 | GTGGGCATGGACCACACTTG      |
|             | reverse                 | GTGGACGCCTTGACTTCCTG      |
| NR_109879   | forward                 | CAGCCGGAAATTTGGCTGT       |
|             | reverse                 | GGGGGTAAAAACGGTGTTTCG     |
| NR_003149   | forward                 | AGTACGGACGGAGTCAGAG       |
|             | reverse                 | CCCTCAGCCATAGCCTACCT      |
| NR_033945   | forward                 | TCCACTCCAACCCAACACAA      |
|             | reverse                 | AATGTTTTCTTTCTCTCCAGATGT  |
| NR_033312   | forward                 | GATGCCACCACTATGCTCCT      |
|             | reverse                 | GACTGAAGTGGTGGTTGCAC      |
| NR_046252   | forward                 | TGCGCCATTTAAGCCACATA      |
|             | reverse                 | TGTTTTTGTCAAGTAAAGGTCAGAG |

**The primer information**

| <b>Gene</b>     | <b>Primer direction</b> | <b>Primer sequence</b>    |
|-----------------|-------------------------|---------------------------|
| NR_131236       | forward                 | GACTTCATCCCTGTACCCCA      |
|                 | reverse                 | AAGCGGTTCTACCATCTCCA      |
| NR_038870       | forward                 | TTCCCAAGGCAAGTGAGTC       |
|                 | reverse                 | CCCTGTGTACTTTGGCTGGA      |
| NR_110246       | forward                 | AGTGAAGTACTTTGGGCAGTCA    |
|                 | reverse                 | ACTGTATTATTGAAGCCATTCCATT |
| NR_034122       | forward                 | TAATCTGCCTTCTCCGAGTCC     |
|                 | reverse                 | GGACTGAATATGAGCGGTTGC     |
| NR_015407       | forward                 | ACCAGTCACCCAACCAGAGC      |
|                 | reverse                 | AAGCGTAAGAATGAAGACCAGTG   |
| NR_038389       | forward                 | GCCCCAACACCTACAATATCCT    |
|                 | reverse                 | TAGCAGCCCCAACTCAAAC       |
| NR_026908       | forward                 | GCTGTGGGTCTGTCACTCAT      |
|                 | reverse                 | GCCACATGGTGCAGAATCTTT     |
| ENST00000449126 | forward                 | TCCCTTCCCCTTCTGCTATGACTG  |
|                 | reverse                 | AGGTGAGATGCTCTGCCATTTGC   |
| ENST00000588324 | forward                 | GGTCAAGCCTGAGATGGTGTCAAC  |
|                 | reverse                 | TGAGAGGTGGTGTCTGCTACG     |
| ENST00000460946 | forward                 | CCCATGTTGCTCAGCTTCTCAGAC  |
|                 | reverse                 | TGCCACCTGGCCATTCTTAAAC    |
| ENST00000520418 | forward                 | AGGCTGGCCGCTTCACTATC      |
|                 | reverse                 | GCTTTCTGTCTCTGCTGCTGTCTG  |
| ENST00000448898 | forward                 | GCAGCAGCCTTATCACATGACCTC  |
|                 | reverse                 | CTGTGTTCCATCCAGTCCAGCAG   |
| ENST00000525548 | forward                 | TCCTCCAATAGTCGCCTCTCAGTC  |
|                 | reverse                 | CGTCCTTCACTCGTCAACCTTTCC  |
| ENST00000445111 | forward                 | CAGCTGGCCAAGTCTGCATT      |
|                 | reverse                 | TGGTCTCCAGAGGTGGTTGAA     |
| ENST00000458111 | forward                 | GTGGGCTCCTTGTTGCTG        |
|                 | reverse                 | GCCCTCACTTCCTTTAGAGGCA    |
| ENST00000435725 | forward                 | GCTTCTGGCATCTCACCTGTCTC   |
|                 | reverse                 | ACCACGACCTTCACGAGAGTCC    |
| ENST00000512521 | forward                 | CCTCCCGAGCCTCAGCCATC      |
|                 | reverse                 | GTTCCATGTCCAGAGCCAACCTCC  |

**The primer information**

| <b>Gene</b>     | <b>Primer direction</b> | <b>Primer sequence</b>    |
|-----------------|-------------------------|---------------------------|
| ENST00000506914 | forward                 | GGCGGAAGGCACAAGTGATGG     |
|                 | reverse                 | GTTCTCAAGAGCTGGGTGGCAAG   |
| ENST00000432265 | forward                 | AGCAGAAACAGGCACTCCTTGATG  |
|                 | reverse                 | GGTGGTGTGGCTCAGTGATGG     |
| ENST00000505796 | forward                 | AGGATCTGAGGAATGTGGCCA     |
|                 | reverse                 | ACTGTATGGGCGAGGCAGAG      |
| ENST00000509185 | forward                 | GCCTGCTGCCATTTCTCTGTC     |
|                 | reverse                 | TCCATTCTGCTCTGCTCCTCTCC   |
| GAPDH           | forward                 | CTGTTCGACAGTCAGCCGCATC    |
|                 | reverse                 | GCGCCCAATACGACCAAATCCG    |
| ACLY            | forward                 | GACTTCGGCAGAGGTAGAGC      |
|                 | reverse                 | TCAGGAGTGACCCGAGCATA      |
| ACC             | forward                 | GGGATAACGTTCCCATCTCC      |
|                 | reverse                 | CACTTCCAAAAAGACCTAGCCC    |
| SCD1            | forward                 | CTTGCTGCAGGACGATATCTCTA   |
|                 | reverse                 | CGTCTTCCAAGTAGAGGGGC      |
| CD36            | forward                 | CTGAGGACTGCAGTGTAGGA      |
|                 | reverse                 | TTTCTACAAGCTCTGGTTCTTATTC |
